1 Femora from an exceptionally large population of coeval ornithomimosaur  
2 yield evidence of sexual dimorphism in extinct theropod dinosaurs

3 Pintore R.\*<sup>1,2</sup>, Cornette R.<sup>3</sup>, Houssaye A.<sup>1</sup>, Allain R.<sup>4</sup>

4 \*romain.pintore@edu.mnhn.fr  
5 +33 (0)1 40 79 48 18

6 1. UMR 7179, Mécanismes Adaptatifs et Évolution (MECADEV), CNRS/Muséum National  
7 d'Histoire Naturelle, 57 rue Cuvier, 75005, Paris, France

8 2. Structure and Motion Laboratory, Department of Comparative Biomedical Sciences, Royal  
9 Veterinary College, Hawkshead Lane, AL9 7TA, Hatfield, United Kingdom

10 3. UMR 7205, Institut de Systématique, Évolution, Biodiversité (ISYEB), CNRS/Muséum National  
11 d'Histoire Naturelle, 57 rue Cuvier, 75005, Paris, France

12 4. UMR 7207, Centre de Recherche en Paléontologie (CR2P), CNRS/Muséum National d'Histoire  
13 Naturelle, 57 rue Cuvier, 75005, Paris, France

14 **Abstract**

15 Sexual dimorphism is challenging to detect among fossils, due to a lack of statistical representativeness.  
16 The Angeac-Charente *Lagerstätte* (France) represents a remarkable “snapshot” from a Berriasian (Early  
17 Cretaceous) ecosystem and offers a unique opportunity to study intraspecific variation among a herd of  
18 at least 61 coeval ornithomimosaur. Herein, we investigated the hindlimb variation across the best-  
19 preserved specimens from the herd through 3D Geometric Morphometrics and Gaussian Mixture  
20 Modelling. Our results based on complete and fragmented femora evidenced a dimorphism  
21 characterized by variations in the shaft curvature and the distal epiphysis width. Since the same features  
22 vary between sexes among modern avian dinosaurs, crocodylians, and more distant amniotes, we  
23 attributed this bimodal variation to sexual dimorphism based on the extant phylogenetic bracketing  
24 approach. Documenting sexual dimorphism in fossil dinosaurs allows a better characterization and  
25 accounting of intraspecific variations, which is particularly relevant to address ongoing taxonomical  
26 and ecological questions relative to dinosaur evolution.

27 **Introduction**

28 Dimorphism has been reported in every major dinosaur clade and has often been attributed to sex-  
29 specific variation (Dodson, 1976; Chapman et al., 1997; Bunce et al., 2003; Padian and Horner, 2011;  
30 Knell and Sampson, 2011; Knell et al., 2013; Mallon, 2017; Saitta et al., 2020). However, recent studies  
31 have demonstrated that most of the documented cases of sexual dimorphism in extinct dinosaurs were  
32 most likely biased by ontogenetic changes, taphonomic deformations and small sample sizes, which

33 substantially affect the representativeness of the inter- and intraspecific diversity, and undermine  
34 statistical analyses (Griffin and Nesbitt, 2016; Hone and Mallon, 2017; Saitta et al., 2020). For example,  
35 a discrete and binary variation between gracile and robust morphologies of bone scars, mostly at the  
36 level of the lesser trochanter, has frequently been inferred, with more or less confidence, as sexual  
37 dimorphism in various ceratosaurian theropods and non-dinosaurian dinosauriforms (Colbert, 1990;  
38 Raath et al., 1990; Benton et al., 2000; Britt et al., 2000; Carrano et al., 2002; Piechowski et al., 2014).  
39 More recently, Griffin & Nesbitt (2016) demonstrated that this feature no longer appeared dimorphic  
40 when accounting for ontogenetic series in the silesaurid *Asilisaurus*. At a larger scale, Mallon (2017)  
41 performed a statistical investigation on a large set of studies that hypothesized sexual dimorphism based  
42 on a wide diversity of anatomical proxies across the major clades of non-avian dinosaurs. However,  
43 among the 48 described occurrences, only nine datasets were suitable for statistical test, among which  
44 only one was considered to rigorously demonstrate dimorphism. Indeed, the combination of a principal  
45 component analysis and a mixture modelling analysis highlighted that the shift in posterior inclination  
46 between the 8<sup>th</sup> and 9<sup>th</sup> dermal plates of *Stegosaurus mjosi* was best explained by a bimodal distribution.  
47 Yet, there is not robust evidence to postulate that the dimorphism shown in dermal plates would be sex-  
48 specific (Saitta, 2015). As a consequence, it appears that no dataset enabled to rigorously demonstrate  
49 the presence of sexual dimorphism in non-avian dinosaurs (Hone et al., 2020). According to Mallon  
50 (2017), one should review three issues when demonstrating sexual dimorphism on extinct organisms:  
51 1) sample size in order to ensure population representativeness; 2) methodology in order to use only  
52 suitable analyses to study sexual dimorphism, such as mixture modelling; (3) any other intraspecific  
53 morphological variation such as ontogeny and pathology, as well as taphonomy.

54 Here, we studied the intraspecific femoral variability among a remarkable population of  
55 ornithomimosaur (Allain et al., 2022, 2014) from the Angeac-Charente *Lagerstätte* (Lower Cretaceous  
56 of France). Rozada et al. (2021, 2014) demonstrated that at least 61 ornithomimosaur individuals  
57 belonged to the same herd and were deposited in a mass mortality event relying on several evidences  
58 (e.g., very limited transport; quality of bone preservation; abundance of individuals with a high skeletal  
59 representation preserved in a restricted spatial distribution; catastrophic age profile of the group;  
60 deposition of sediment and bones under coeval; poorly oxygenated burial and diagenesis conditions  
61 given by their rare earth elements and Yttrium profiles). Thus, the ornithomimosaur herd of Angeac-  
62 Charente represents a unique occasion to study subtle parameters such as intraspecific variability in  
63 extinct dinosaurs. Moreover, the exceptionally high minimal number of individuals among the herd  
64 offers a singular opportunity to test for the presence of dimorphism and characterize its variation.

65 We used a 3D Geometric Morphometric (3D GMM) approach that combines anatomical landmarks and  
66 sliding semilandmarks along curves and surfaces on both complete and fragmented femora and tibiae  
67 (Fig. S1A-B) (Gunz et al., 2005; Gunz and Mitteroecker, 2013). This method is well suited to study  
68 biological objects, including limb bones, and to detect subtle intraspecific shape variations (Zelditch et

69 al., 2012; Botton-Divet et al., 2016) such as dimorphism (Fabre et al., 2014). We then investigated the  
70 resulting dataset using Principal Component Analyses (PCA) and Gaussian Mixture (GM) modelling  
71 as clustering analyses. This clustering analysis calculates the number of Gaussian distributions present  
72 in a dataset by maximum likelihood estimations and has been demonstrated as a well-suited method for  
73 the identification of dimorphism (Godfrey et al., 1993; Dong, 1997; Fabre et al., 2014; Manin et al.,  
74 2016; Mallon, 2017; Saitta et al., 2020)

75 **Institutional abbreviation:** ANG: Angeac-Charente Collection, Musée d'Angoulême, Angoulême, FR

## 76 **Results**

77 We highlight a dimorphic variation in femora from the ornithomimosaur herd of Angeac-Charente (Fig.  
78 1A-B). This dimorphic variation is localized along the diaphysis (i.e., lateromedial curvature) and  
79 toward the distal epiphysis (i.e., lateromedial width) of the femur (Fig. 1C-D). Distributions along the  
80 PC1 of complete femora (28.8%) and distal epiphyses (27.9%) are best described by two clusters with  
81 a ratio close to 1:1 according to mixture modelling analyses (see Table S1 for details). PC1 scores from  
82 both analyses are not significantly correlated to the log centroid size, indicating that size-related effects  
83 have no impact on the observed dimorphism ( $p\text{-value} > 0.1$  for complete femora and distal epiphyses,  
84 Table S1).

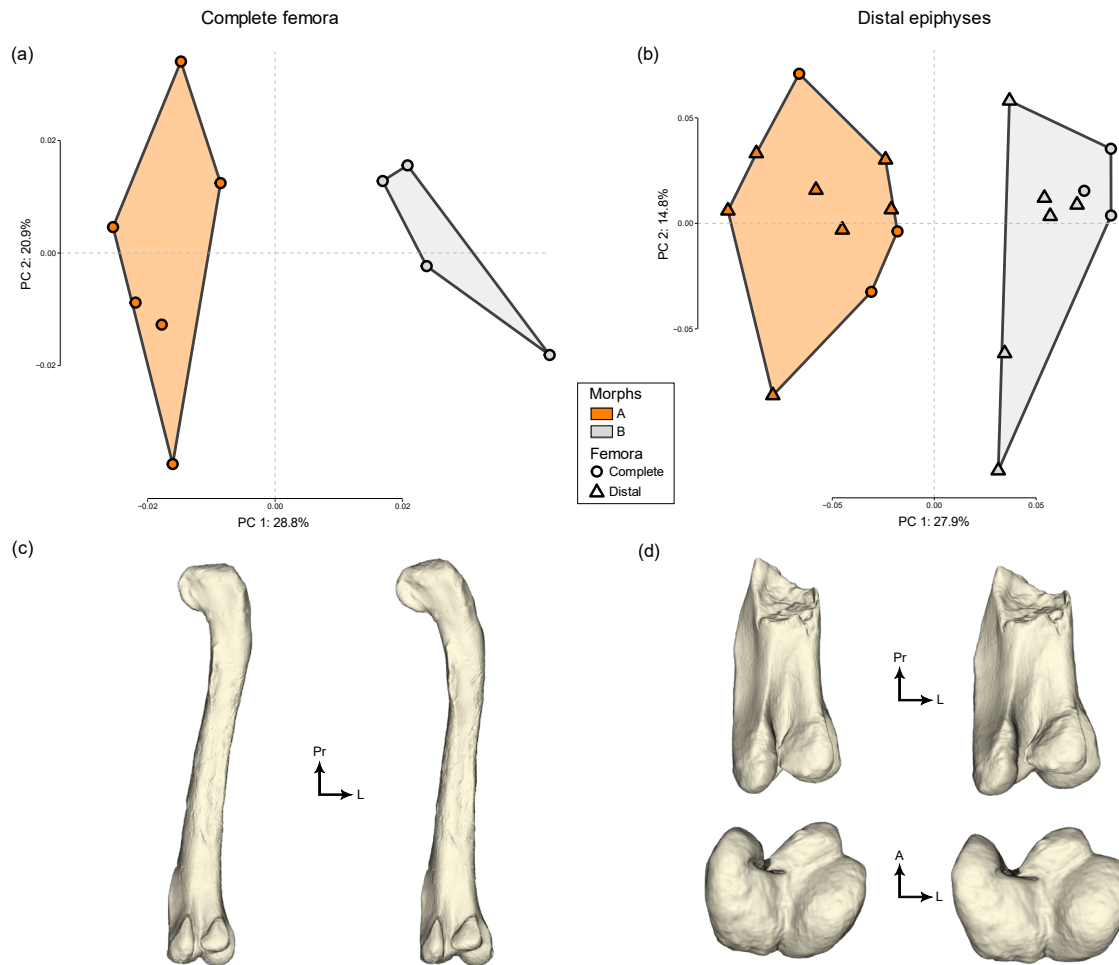

85

86 Figure 1: The two first axes of the PCA for A) complete femora and B) distal epiphyses; Minimal (left)  
87 and maximal (right) mean shapes per group for C) complete femora in posterior view and D) distal  
88 epiphyses in posterior (top) and distal (bottom) views. Abbreviations: L, lateral; P, Posterior; Pr,  
89 proximal.

90 The most important morphological variation of complete femora is a medial to lateral curvature of the  
91 femur (Fig. 1C). The proximal third of the femur appears deviated toward the lateral side in specimens  
92 on the negative part of the axis, whereas specimens located on the positive part have straight to medially  
93 curved femora (Fig. 1C). Coincidentally, the femoral head is directed medially in the negative cluster  
94 while it is inclined ventromedially in the positive one (Fig. 1C). Regarding distal epiphyses, we selected  
95 six (out of 10) epiphyses from complete femora because the other four were taphonomically altered or  
96 pyrite encrusted only in the distal area, which would appear relatively more important in analyses  
97 restricted only to this area rather than on the complete morphology (Table S2). Nevertheless, for distal  
98 epiphyses the most important morphological variation along PC1 is the expansion of the lateromedial  
99 width relative to the anteroposterior length, which is greater in specimens on the positive part of the  
100 PC1 axis than on the negative one (Fig. 1D). In addition, we highlight that the six distal epiphyses from  
101 complete femora are consistently attributed to the same clusters between the two analyses (Fig. 1A-B;

102 Table S2). Hence, our study shows that the straighter the shaft is, the more robust the epiphysis is, and  
103 that this relationship is dimorphic.

104 However, there is no robust bimodal distribution on proximal epiphyses, as shown by the GM analyses  
105 (Fig. S2; no consistency in the specimen attribution between complete femora and proximal epiphyses).  
106 Similarly, there is no dimorphism in the morphological variation of complete tibiae (Fig. S3) along PC1  
107 (24.1%) and PC2 (20.0%).

## 108 **Discussion**

109 The closest extant relatives of non-avian dinosaurs are known to display sexual dimorphism with more  
110 or less visibility: birds display variation in their plumage and skeleton (Schnell et al., 1985; Owens and  
111 Hartley, 1998; Dunn et al., 2001; Székely et al., 2007; Clarke, 2013; Duggan et al., 2015; Manin et al.,  
112 2016; Hone and Mallon, 2017; Elzanowski and Louchart, 2022), whereas the variation is restricted to  
113 skeleton in crocodylians (Fitch, 1981; Farlow et al., 2005; Cox et al., 2007; Prieto-Marquez et al., 2007;  
114 Bonnan et al., 2008; Hone and Mallon, 2017; Hone et al., 2020). The extant phylogenetic bracket (EPB)  
115 of non-avian dinosaurs (Witmer and Thomason, 1995) thus implies they were sexually dimorphic too  
116 (Hone and Mallon, 2017; Hone et al., 2020).

117 A femoral dimorphism of the same nature was demonstrated to be sex-specific among populations of  
118 extant tetrapods such as carnivorans and primates. Dimorphism in the femoral obliquity (also termed  
119 “bicondylar angle”) was observed in humans, for which females had higher angles than males (Parsons,  
120 1914; Tardieu et al., 2006; Hunt et al., 2021). Moreover, a higher lateromedial width of the distal  
121 epiphysis (also termed “epicondylar width” or “bicondylar breadth”) was demonstrated to vary between  
122 sexes in grey wolves and other carnivorans, as well as in primates (Alunni-Perret et al., 2008; Gaikwad  
123 and Nikam, 2014; Morris and Brandt, 2014; Cavaignac et al., 2016; Morris and Carrier, 2016). Whereas  
124 no similar sexual dimorphism had been shown – or studied – in non-archosaurian sauropsids to our  
125 knowledge, many relevant examples are available in extant and sub-fossil archosaurs. A higher distal  
126 width in males than females was demonstrated in wild and captive *Alligator mississippiensis* using  
127 linear and geometric morphometrics (Farlow et al., 2005; Bonnan et al., 2008). Handley et al. (2016)  
128 demonstrated that femoral distal width of the more recently extinct flightless bird *Dromornis stirtoni*  
129 was also higher in males than females. To do so, they coupled morphometrics and multivariate statistics  
130 with the observation of medullary bone, a sex-specific tissue present in bones of egg-laying female in  
131 archosaurians (Dacke et al., 1993; Schweitzer et al., 2005, 2007; Canoville et al., 2019). The same kind  
132 of sexual dimorphism was observed in modern birds like California gulls (*Larus californicus*) (Schnell  
133 et al., 1985) and in the two extant species of ostriches (*Struthio c. camelus*, *S. c. molybdophanes*), but  
134 with reversed proportions between males and females (Elzanowski and Louchart, 2022). Furthermore,  
135 (Duggan et al., 2015) demonstrated that young male domestic ducks (*Anas platyrhynchos*) had more  
136 laterally curved femora than females, and that this sexually dimorphic feature disappeared along

137 ontogeny. However, to our knowledge and aside Duggan et al. (2015), data about femoral obliquity is  
138 generally unavailable in most studies including sex determination in birds and other sauropsids.  
139 Therefore, because the femoral dimorphic features we highlighted in the Angeac-Charente  
140 ornithomimosaur herd were also demonstrated to vary between sexes in more or less closely related  
141 extant vertebrate clades, we infer it to be sexual.

142 We found no allometry along the first PC axis (Table S1), which indicates that the dimorphism we  
143 highlighted is not related to size. Ontogenetic allometry was often misinterpreted as sexual dimorphism  
144 in archosaurs, as demonstrated in the early dinosauriform *Asilisaurus kongwe*, the crocodylian *Alligator*  
145 *mississippiensis* and the bird *Rhea americana* (Griffin and Nesbitt, 2016; Hone and Mallon, 2017;  
146 Hedrick et al., 2021). Furthermore, this indicates no Sexual Size Dimorphism (SSD) in the Angeac-  
147 Charente ornithomimosaur. SSD is one of the most documented sexual dimorphism across all living  
148 organisms, whether it is biased toward females or males (Darwin, 1874; Fairbairn et al., 2007). There  
149 are many examples of observations and/or inferences of SSD and allometric relationships in extant and  
150 extinct dinosaurs (Larson, 1994; Bunce et al., 2003; Clarke, 2004; Székely et al., 2007; Remeš and  
151 Székely, 2010; Olson and Turvey, 2013; Handley et al., 2016; Manin et al., 2016; Fajemilehin, 2017).  
152 However, Elzanowski & Louchart (2022) demonstrated that female ostriches had more robust limb  
153 bones but smaller average body size than males. This decoupling between size and shape dimorphism  
154 is concordant with our results and emphasizes that sexual dimorphism is not necessarily reflected by  
155 body size nor allometry between limb segments. Thus, size-independent sexual dimorphism should be  
156 investigated further in extant archosaurs in order to improve inferences about sexual dimorphism in  
157 fossils, which are most often represented only by isolated bones.

158 We did not identify any other dimorphism in either the proximal part of the femur nor in complete tibia  
159 of the Angeac-Charente ornithomimosaur (Fig. S2 & S3). However, sexual dimorphism was observed  
160 in the proximal ends of femora in extant ostriches (Charuta et al., 2007; Elzanowski and Louchart, 2022)  
161 and California gulls (Schnell et al., 1985). In addition, the anteroposterior width of the femoral shaft  
162 was demonstrated to vary between sexes among savannah sparrows (*Passerculus sandwichensis*;  
163 Rising, 1987) and three species of steamer-ducks (*Tachyeres pteneres*, *T. leucocephalus*, *T.*  
164 *patachonicus*, (Livezey and Humphrey, 1984). Yet, and accordingly with our results, size-independent  
165 dimorphism in the avian tibiotarsus seems less common across the EPB. Indeed, to our knowledge,  
166 occurrences of shape dimorphism in the tibia was demonstrated only in California gulls (e.g., width of  
167 the shaft) (Schnell et al., 1985) and in ostriches [e.g., anteroposterior width of the distal epiphysis; only  
168 in Elzanowski & Louchart (2022) but not in Charuta et al. (2007)]. Furthermore, our observation that  
169 sexual dimorphism could be restricted to the femur in the Angeac-Charente ornithomimosaur and  
170 modern archosaurs raises the question of the potential co-variation between the femur and the pelvis.  
171 Sexual dimorphism was observed in the ilium of several birds mentioned previously, such as ostriches,  
172 steamer-ducks, savannah sparrows, and California gulls (in the antitrochanter width, acetabular width



173 and synsacrum width and length) (Livezey and Humphrey, 1984; Schnell et al., 1985; Rising, 1987;  
174 Charuta et al., 2007). All measurements were higher in male birds than in female birds except for the  
175 width of the ilium, which was higher in female ostriches when measured by Charuta et al. (2007), but  
176 not significantly different between sexes in Elzanowski & Louchart (2022). Additionally, female  
177 alligators had a deeper pelvic canal (i.e., distance between the ventral side of the first sacral vertebra  
178 and the ventral margin of the ischial symphysis) (Prieto-Marquez et al., 2007). The dimorphism was  
179 located preferably on the femur rather than on the tibia in the Angeac-Charente ornithomimosaur, which  
180 suggests that the pelvic area might as well be dimorphic, and that seems to be generally the case in some  
181 modern avian dinosaurs too (Livezey and Humphrey, 1984; Schnell et al., 1985; Rising, 1987; Farlow  
182 et al., 2005; Charuta et al., 2007; Prieto-Marquez et al., 2007; Bonnan et al., 2008; Duggan et al., 2015;  
183 Elzanowski and Louchart, 2022). Could the ability to carry egg restrict the location of sexual  
184 dimorphism closer to the hip region? Sexual dimorphism in the pelvic girdle, the proximal hindlimb  
185 and the morphological integration between the two in female extant archosaurs should be investigated  
186 further to answer this question.

187 Our results did not permit to confidently sex each morphotype. Most modern occurrences of femoral  
188 sexual dimorphism indicate a wider distal epiphysis among males than females, but Elzanowski &  
189 Louchart (2022) showed that the opposite was also true for modern and subfossils ostriches.  
190 Furthermore, our results indicated that femora with the narrowest distal epiphyses (females in most of  
191 modern occurrences) had a laterally deviated shaft. However, (Duggan et al., 2015) demonstrated that  
192 only juvenile male Pekin ducks had a laterally deviated shaft, which is not congruent with our results  
193 that the widest epiphyses were associated with a straighter morphotype. Paleohistological analyses  
194 could enable to verify sex assignment by assessing the presence of medullary bone, as some gravid  
195 females may have died during their egg-laying cycle at the time of the mass-mortality event recorded  
196 at Angeac-Charente. Indeed, medullary bone was recently demonstrated as probably the most reliable  
197 indicator of sex with an extensive distribution across the skeleton (Canoville et al., 2019). A  
198 paleohistological investigation could also confirm the ontogenetic homogeneity among our femoral  
199 sample, as recommended by Griffin & Nesbitt (2016), Hone & Mallon (2017) and Mallon (2017).

## 200 **Conclusion**

201 Our results demonstrate that the femoral morphology among a large herd of coeval ornithomimosaur  
202 is dimorphic. We identify bimodal distributions along size-independent features that were already  
203 reported to vary between sexes in modern archosaurs, and other tetrapods (e.g., the width of the distal  
204 epiphyses and the lateral deviation of the shaft). Therefore, we infer these features to indicate sexual  
205 dimorphism in the Angeac-Charente ornithomimosaur according to the EPB approach. Our findings  
206 inform about the intraspecific variability in non-avian theropods and emphasize the need for description  
207 of size-independent dimorphism in modern and closely related taxa with a priori knowledge of the sex.

208 In the future, our results should be completed by paleohistological studies to 1) sex each morphotype  
209 and 2) identify the extent of ontogenetic variations within our sample. Additionally, we show that the  
210 sex-ratio of the Angeac-Charente ornithomimosaur is close to 1:1 and thus, likely Fisherian (Fisher,  
211 1930). It was demonstrated that in extant archosaurs, Fisherian populations are only observed among  
212 clutches and hatchlings (Mayr, 1939; Clutton-Brock, 1986; Liker et al., 2013), and become generally  
213 biased toward females in sub-adult and adult populations, as demonstrated on crocodylians (Woodward  
214 and Murray, 1993; González et al., 2019) and ratites (Magige, 2012; Prokopenko et al., 2021).  
215 Therefore, paleohistological investigations could help characterize the variation of sex ratio along  
216 ontogeny in an extinct dinosaur population, and inform if it was truly Fisherian, unlike their extant  
217 relatives, or if it also experienced skewness along aging. More broadly, understanding how sex  
218 impacted the morphology of an extinct species could shed light on complex evolutionary mechanism  
219 such as trade-off between sexually dimorphic features, ecological adaptations and life-history traits.

## 220 **Material and Methods**

### 221 **Sample and data acquisition**

222 Table 1. Number of femora and tibiae from the Angeac-Charente ornithomimosaur discovered between  
223 2010 and 2020. Minimum Number of Elements (MNE) and Minimum Number of Individuals (MNI)  
224 are given for each fragmented and complete femora.

|                      | Femur | Tibia |
|----------------------|-------|-------|
| Left proximal (MNE)  | 31    | 31    |
| Right proximal (MNE) | 35    | 35    |
| Left distal (MNE)    | 18    | 48    |
| Right distal (MNE)   | 22    | 46    |
| Left complete (MNE)  | 8     | 13    |
| Right complete (MNE) | 11    | 12    |
| MNI                  | 46    | 61    |

225

226 Several complete and fragmented femora and complete tibiae from the Angeac-Charente  
227 ornithomimosaur were discovered between 2010 and 2020 (Table 1). We removed 158 specimens that  
228 were too fragmented and altered by too much oxidized pyrite and trampling (femora: six complete, 37  
229 proximal and 19 distal epiphyses; tibiae: four complete, 36 proximal and 56 distal epiphyses). We  
230 selected only fragmented femora that preserved: 1) the most proximal point of the fourth trochanter for  
231 proximal epiphyses; 2) the most proximal point of the anteromedial flange for distal epiphyses (Figure  
232 a). In total, we digitized 152 specimens (femora: 13 complete, 29 proximal and 21 distal epiphyses;  
233 tibiae: 21 complete, 30 proximal and 38 distal epiphyses) using the Artec EVA with Artec Studio



234 Professional v. 12.1.1.12 (Artec 3D, Luxembourg, Luxembourg) and the NextEngine with Scan Studio  
235 Pro v. 2.0.2 (Next Engine inc., Santa Monica, United States) for a few specimens (Table S3). After re-  
236 examination of digitized specimens, we removed three complete femora, 14 proximal and eight distal  
237 epiphyses, and four complete tibiae that were distorted. We thus integrated 10 complete femora, 13  
238 distal and 15 proximal femoral epiphyses, and 17 complete tibiae.

### 239 **3D geometric morphometrics**

240 3D GMM is a well-established method for quantifying biological shape variations and has already  
241 enabled to identify sexual dimorphism in past studies (Kaliontzopoulou et al., 2007; Cavaignac et al.,  
242 2016). We followed a high-density morphometrics approach using a combination of single anatomical  
243 landmarks and sliding semilandmarks along curves and surfaces (Bookstein, 1997; Gunz et al., 2005).  
244 Indeed, most anatomical landmarks are usually concentrated on both ends of limb bones, hence why  
245 the use of sliding semilandmarks on surface was justified on the shaft (Gunz and Mitteroecker, 2013;  
246 Botton-Divet et al., 2016). We digitized 619 landmarks on complete femora (25 anatomical landmarks,  
247 99 sliding semilandmarks on curves and 495 on surfaces), 479 on proximal (11 anatomical landmarks,  
248 26 sliding semilandmarks on curves and 442 on surfaces) and distal epiphyses (10 anatomical  
249 landmarks, 45 sliding semilandmarks on curves and 424 on surfaces) and 725 on complete tibiae (23  
250 anatomical landmarks, 219 sliding semilandmarks on curves and 483 on surfaces; see details in Figure  
251 S4; Table S4 & S5) using the IDAV Landmark software v. 3.0.0.6 (Wiley et al., 2005). We digitized  
252 anatomical landmarks and sliding semilandmarks along curves on each specimen and sliding semi-  
253 landmarks along surfaces on one specimen (ANG 10 90), referred to as “the template” hereafter  
254 (Cornette et al., 2013). We then automatically projected the sliding semilandmarks along surfaces of  
255 the template onto every other specimen following the spline relaxation of semilandmarks along curves  
256 using the function “placePatch” of the Morpho package v. 2.8 (Schlager, 2017). Then, we performed  
257 five iterations of another spline relaxation between landmark configurations of the template and the  
258 ones from every other specimen using the function “relaxLM” of Morpho. Finally, we performed a  
259 partial Procrustes fitting in order to compute a Procrustes consensus of every configuration and used it  
260 as a target for the two last iterations of spline relaxation using the function “slideLM” of Morpho. These  
261 three steps of spline relaxations ensured that every semilandmark position was geometrically  
262 homogeneous in all specimens (Gunz et al., 2005). Finally, we performed a Generalized Procrustes  
263 Analysis (GPA) using the function “gpagen” of the R package geomorph v. 3.3.1 (Adams and Otárola-  
264 Castillo, 2013) in order to align each femur in the Cartesian coordinate system by superimposing them  
265 based on their landmark configuration and to rule out the effect of size, location and orientation of the  
266 different landmark configurations (Gower, 1975; Rohlf and Slice, 1990; Zelditch et al., 2012).

### 267 **Statistical analyses and clustering**

268 We performed a Principal Component Analysis (PCA) in order to reduce dimensionalities of the  
269 variation and isolate different components of shape variation (Gunz and Mitteroecker, 2013). The  
270 quantification of repeatability was performed by digitizing landmarks iteratively ( $n = 10$ ) on three close  
271 specimens for complete femora and tibiae, which resulted in 30 configurations for each bone. We then  
272 computed a PCA for the two bones (30 configurations each), which showed that all 10 repetitions for  
273 each specimen were grouped together and isolated from those of the other specimens along the first two  
274 PC axes (Figure S5 & S6). This ensured that that biological variability was greater than the operator  
275 effect, which refers to the ability to reproduce accurately the same landmark configuration multiple  
276 times on the same specimen. As recommended by Mallon (Mallon, 2017), we performed mixture  
277 modelling analyses without a-priori knowledge about the number of groups in order to estimate how  
278 many morphological clusters would stand out in our dataset, if any, along each PC axis. Gaussians are  
279 well-suited functions to describe a biological population, especially when applied to a morphometric  
280 dataset (Baylac et al., 2003). We used the R package Mclust v. 5.4.7, which calculates the most-probable  
281 number of clusters in a dataset based on the detection of Gaussian distributions by maximum likelihood  
282 estimations (Scrucca et al., 2016). Bayesian Information Criteria (BIC; e.g., an approximation of Bayes  
283 factors for comparing likelihood) were used to choose which model, among the several ones available,  
284 fitted best with our dataset (i.e., the model with the highest BIC), while simultaneously estimating the  
285 number of Gaussian distributions (Fraley and Raftery, 2007). We computed 3D visualizations that  
286 highlighted which feature varied the most along each axis, and between clusters when dimorphism was  
287 identified. To do so, we first computed a 3D consensual mesh of all specimens of the sample by using  
288 the function “tps3d” from the R package Morpho v. 2.8 (Schlager, 2017) which performed a spline  
289 relaxation that minimized the bending energy of a Thin Plate Spline (TPS) between the template  
290 landmark configuration and a mean landmark configuration (obtained during the GPA). Then, the  
291 function used the resulting TPS deformation to warp the 3D mesh of the template onto the mean shape  
292 in order to compute a 3D consensual mesh (Bardua et al., 2019). Next, we calculated the mean  
293 coordinates of every specimen in each cluster along the PC axis identified as dimorphic by the mixture  
294 modelling analysis. Finally, we warped the mean shape, and its associated 3D mesh, onto the mean  
295 landmark configurations of each cluster by using the “shape.predictor” function of geomorph v. 3.3.1  
296 (Adams and Otárola-Castillo, 2013) in order to visualize the 3D shape variation associated with the  
297 dimorphic PC axis. We studied the allometry within our sample [i.e., the size-related morphological  
298 variation (Klingenberg, 2016)], using Pearson’s correlation between each PC scores and the log-  
299 transformed centroid sizes using the R function “cor.test”.

### 300 **Acknowledgments**

301 We warmly thank D. Augier, J.-F. Tournepiche (The museum of Angoulême) for access to specimens,  
302 A. Aumont, G. Baron (La Rochelle Museum) for access to specimens in temporary exhibit, F. Goussard  
303 (MNHN) for 3D digitizations with NextEngine and L. Rozada and J. Goedert (MNHN) for help with

304 retrieving some specimens. We are indebted to the Audoin & Fils company for sharing their discovery  
305 with us and for providing us with logistical support. We would like to thank Mrs. Rodet, the Audoin  
306 family and the department of La Charente for donating all the fossil material discovered in Angeac-  
307 Charente to the museum of Angoulême. We acknowledge the contribution of professional and amateur  
308 paleontologists and the numerous students who participated in the Angeac-Charente excavations since  
309 2010. We also thank B. Bed'hom. (MNHN) for very helpful discussions about sexual dimorphism in  
310 extant domestic birds. Finally, we thank C. Bader, A. Canoville, C. Etienne, J. Goedert, R. Lefebvre,  
311 K. Leverger, and C. Mallet for constructive discussions and recommendations about digitization,  
312 analyses and interpretation of data.

### 313 **Fundings**

314 This study was supported by the European Research Council under a Horizon 2020 Starting Grant  
315 GRAVIBONE (715300 to A.H.), and the field recovery of ornithomimosaur specimens under the  
316 financial support of the Department of La Charente, the Châteauneuf community of communes, the  
317 Grand Cognac community of communes and the City of Angoulême.

### 318 **References**

- 319 Adams, D.C., Otárola-Castillo, E., 2013. geomorph: an r package for the collection and analysis of  
320 geometric morphometric shape data. *Methods in Ecology and Evolution* 4, 393–399.  
321 <https://doi.org/10.1111/2041-210X.12035>
- 322 Allain, R., Vullo, R., Le Lœuff, J., Tournepiche, J.F., 2014. European ornithomimosaur (Dinosauria,  
323 Theropoda): an undetected record. 105. <https://doi.org/10.1344/105.000002083>
- 324 Allain, R., Vullo, R., Rozada, L., Anquetin, J., Bourgeais, R., Goedert, J., Lasseron, M., Martin, J.E.,  
325 Pérez-García, A., De Fabrégues, C.P., Royo-Torres, R., Augier, D., Bailly, G., Cazes, L.,  
326 Despres, Y., Gailliègue, A., Gomez, B., Goussard, F., Lenglet, T., Vacant, R., Mazan, .,  
327 Tournepiche, J.-F., 2022. Vertebrate paleobiodiversity of the Early Cretaceous (Berriasian)  
328 Angeac-Charente Lagerstätte (southwestern France): implications for continental faunal  
329 turnover at the J/K boundary. *Geodiversitas* 44.  
330 <https://doi.org/10.5252/geodiversitas2022v44a25>
- 331 Alunni-Perret, V., Staccini, P., Quatrehomme, G., 2008. Sex determination from the distal part of the  
332 femur in a French contemporary population. *Forensic Science International* 175, 113–117.  
333 <https://doi.org/10.1016/j.forsciint.2007.05.018>
- 334 Bardua, C., Felice, R.N., Watanabe, A., Fabre, A.-C., Goswami, A., 2019. A Practical Guide to  
335 Sliding and Surface Semilandmarks in Morphometric Analyses. *Integrative Organismal*  
336 *Biology* 1, obz016. <https://doi.org/10.1093/iob/obz016>
- 337 Baylac, M., Villemant, C., Simbolotti, G., 2003. Combining geometric morphometrics with pattern  
338 recognition for the investigation of species complexes: Geometric morphometrics, pattern  
339 recognition and species complexes. *Biological Journal of the Linnean Society* 80, 89–98.  
340 <https://doi.org/10.1046/j.1095-8312.2003.00221.x>
- 341 Benton, M.J., Juul, L., Storrs, G.W., Galton, P.M., 2000. Anatomy and systematics of the prosauropod  
342 dinosaur *Thecodontosaurus antiquus* from the upper Triassic of southwest England. *Journal*  
343 *of Vertebrate Paleontology* 20, 77–108. [https://doi.org/10.1671/0272-4634\(2000\)020\[0077:AASOTP\]2.0.CO;2](https://doi.org/10.1671/0272-4634(2000)020[0077:AASOTP]2.0.CO;2)
- 344  
345 Bonnan, M.F., Farlow, J.O., Masters, S.L., 2008. Using linear and geometric morphometrics to detect  
346 intraspecific variability and sexual dimorphism in femoral shape in *Alligator mississippiensis*  
347 and its implications for sexing fossil archosaurs. *Journal of Vertebrate Paleontology* 28, 422–  
348 431. [https://doi.org/10.1671/0272-4634\(2008\)28\[422:ULAGMT\]2.0.CO;2](https://doi.org/10.1671/0272-4634(2008)28[422:ULAGMT]2.0.CO;2)

- 349 Bookstein, F.L., 1997. Landmark methods for forms without landmarks: morphometrics of group  
350 differences in outline shape. *Medical image analysis* 1, 225–243.
- 351 Botton-Divet, L., Cornette, R., Fabre, A.-C., Herrel, A., Houssaye, A., 2016. Morphological Analysis  
352 of Long Bones in Semi-aquatic Mustelids and their Terrestrial Relatives. *Integr. Comp. Biol.*  
353 56, 1298–1309. <https://doi.org/10.1093/icb/icw124>
- 354 Britt, B.B., Chure, D.J., Holtz Jr, T.R., Miles, C.A., Stadtman, K.L., 2000. A reanalysis of the  
355 phylogenetic affinities of *Ceratosaurus* (Theropoda, Dinosauria) based on new specimens  
356 from Utah, Colorado, and Wyoming. *Journal of Vertebrate Paleontology* 20.
- 357 Bunce, M., Worthy, T.H., Ford, T., Hoppitt, W., Willerslev, E., Drummond, A., Cooper, A., 2003.  
358 Extreme reversed sexual size dimorphism in the extinct New Zealand moa *Dinornis*. *Nature*  
359 425, 172–175. <https://doi.org/10.1038/nature01871>
- 360 Canoville, A., Schweitzer, M.H., Zanno, L.E., 2019. Systemic distribution of medullary bone in the  
361 avian skeleton: ground truthing criteria for the identification of reproductive tissues in extinct  
362 *Avemmetatarsalia*. *BMC Evol Biol* 19, 71. <https://doi.org/10.1186/s12862-019-1402-7>
- 363 Carrano, M.T., Sampson, S.D., Forster, C.A., 2002. The osteology of *Masiakasaurus knopfleri*, a  
364 small abelisauroid (Dinosauria: Theropoda) from the Late Cretaceous of Madagascar. *Journal*  
365 *of Vertebrate Paleontology* 22, 510–534. [https://doi.org/10.1671/0272-](https://doi.org/10.1671/0272-4634(2002)022[0510:TOOMKA]2.0.CO;2)  
366 [4634\(2002\)022\[0510:TOOMKA\]2.0.CO;2](https://doi.org/10.1671/0272-4634(2002)022[0510:TOOMKA]2.0.CO;2)
- 367 Cavaignac, E., Savall, F., Faruch, M., Reina, N., Chiron, P., Telmon, N., 2016. Geometric  
368 morphometric analysis reveals sexual dimorphism in the distal femur. *Forensic Science*  
369 *International* 259, 246.e1-246.e5. <https://doi.org/10.1016/j.forsciint.2015.12.010>
- 370 Chapman, R.E., Weishampel, D.B., Hunt, G., Rasskin-Gutman, D., 1997. Sexual dimorphism in  
371 dinosaurs, in: *Dinofest International*. pp. 83–93.
- 372 Charuta, A., Dzierżęcka, G., Reymond, J., Mańkowska-Pliszka, H., 2007. Morfologia i morfometria  
373 obręczy oraz części wolnej kończyny miednicznej strusia. *Medycyna Weterynaryjna* 63,  
374 1090–1094.
- 375 Clarke, J.A., 2013. Feathers before flight. *Science* 340, 690–692.
- 376 Clarke, J.A., 2004. Morphology, phylogenetic taxonomy, and systematics of *Ichthyornis* and  
377 *Apatornis* (Avialae: Ornithurae). *amnb* 2004, 1–179. [https://doi.org/10.1206/0003-](https://doi.org/10.1206/0003-0090(2004)286<0001:MPTASO>2.0.CO;2)  
378 [0090\(2004\)286<0001:MPTASO>2.0.CO;2](https://doi.org/10.1206/0003-0090(2004)286<0001:MPTASO>2.0.CO;2)
- 379 Clutton-Brock, T.H., 1986. Sex ratio variation in birds. *Ibis* 128, 317–329.
- 380 Colbert, E.H., 1990. Variation in *Coelophysis bauri*. En: K. Carpenter & PJ Currie (Eds.), *Dinosaur*  
381 *systematics: approaches and perspectives*.
- 382 Cornette, R., Baylac, M., Souter, T., Herrel, A., 2013. Does shape co-variation between the skull and  
383 the mandible have functional consequences? A 3D approach for a 3D problem. *J. Anat.* 223,  
384 329–336. <https://doi.org/10.1111/joa.12086>
- 385 Cox, R.M., Butler, M.A., John-Alder, H.B., 2007. The evolution of sexual size dimorphism in  
386 reptiles, in: Fairbairn, D.J., Blanckenhorn, W.U., Székely, T. (Eds.), *Sex, Size and Gender*  
387 *Roles: Evolutionary Studies of Sexual Size Dimorphism*. Oxford University Press, pp. 38–49.
- 388 Dacke, C.G., Arkle, S., Cook, D.J., Wormstone, I.M., Jones, S., Zaidi, M., Bascal, Z.A., 1993.  
389 Medullary bone and avian calcium regulation 26.
- 390 Darwin, C.R., 1874. *The descent of man, and selection in relation to sex*. 2nd edn. John Murray,  
391 London.
- 392 Dodson, P., 1976. Taxonomic implications of relative growth in lambeosaurinae hadrosaurs.  
393 *Systematic Zoology* 24, 37–54.
- 394 Dong, Z., 1997. Mixture Analysis and its Preliminary Application in Archaeology. *Journal of*  
395 *Archaeological Science* 24, 141–162. <https://doi.org/10.1006/jasc.1996.0100>
- 396 Duggan, B.M., Hocking, P.M., Schwarz, T., Clements, D.N., 2015. Differences in hindlimb  
397 morphology of ducks and chickens: effects of domestication and selection. *Genet Sel Evol* 47,  
398 88. <https://doi.org/10.1186/s12711-015-0166-9>
- 399 Dunn, P.O., Whittingham, L.A., Pitcher, T.E., 2001. Mating systems, sperm competition, and the  
400 evolution of sexual dimorphism in birds. *Evolution* 55, 161–175.
- 401 Elzanowski, A., Louchart, A., 2022. Metric variation in the postcranial skeleton of ostriches, *Struthio*  
402 (Aves: Palaeognathae), with new data on extinct subspecies. *Zoological Journal of the*  
403 *Linnean Society* 195, 88–105. <https://doi.org/10.1093/zoolinnean/zlab049>



- 404 Fabre, A.-C., Cornette, R., Huyghe, K., Andrade, D.V., Herrel, A., 2014. Linear versus geometric  
405 morphometric approaches for the analysis of head shape dimorphism in lizards: Head Shape  
406 Dimorphism in *Tupinambis*. *Journal of Morphology* 275, 1016–1026.  
407 <https://doi.org/10.1002/jmor.20278>
- 408 Fairbairn, D.J., Blanckenhorn, W.U., Székely, T. (Eds.), 2007. Sex, size, and gender roles:  
409 evolutionary studies of sexual size dimorphism, Oxford biology. Oxford University Press,  
410 Oxford ; New York.
- 411 Fajemilehin, S.O.K., 2017. Discriminant analysis of sexual dimorphism in zoometrical characters of  
412 normal feathered Yoruba ecotype adult local chicken in the Tropical Forest Zone of Nigeria.  
413 *JASVM* 2, 139–144. <https://doi.org/10.31248/JASVM2017.060>
- 414 Farlow, J.O., Hurlburt, G.R., Elsey, R.M., Britton, A.R.C., Langston, W., 2005. Femoral dimensions  
415 and body size of *Alligator mississippiensis*: estimating the size of extinct  
416 mesoeucrocodylians. *Journal of Vertebrate Paleontology* 25, 354–369.  
417 [https://doi.org/10.1671/0272-4634\(2005\)025\[0354:FDABSO\]2.0.CO;2](https://doi.org/10.1671/0272-4634(2005)025[0354:FDABSO]2.0.CO;2)
- 418 Fisher, R.A., 1930. *The Genetical Theory of Natural Selection*. Oxford, UK: Clarendon Press.
- 419 Fitch, H.S., 1981. Sexual size differences in reptiles. *Miscellaneous publications of the Museum of*  
420 *Natural History University of Kansas* 70, 1–72.
- 421 Fraley, C., Raftery, A.E., 2007. Bayesian regularization for normal mixture estimation and model-  
422 based clustering. *Journal of classification* 24, 155–181.
- 423 Gaikwad, K.R., Nikam, V.R., 2014. Sexual dimorphism in femur. *IOSR Journal of Dental and*  
424 *Medical Sciences* 13, 4–9.
- 425 Godfrey, L.R., Lyon, S.K., Sutherland, M.R., 1993. Sexual dimorphism in large-bodied primates: the  
426 case of the subfossil lemurs. *American Journal of Physical Anthropology* 90, 315–334.
- 427 González, E.J., Martínez-López, M., Morales-Garduza, M.A., García-Morales, R., Charruau, P.,  
428 Gallardo-Cruz, J.A., 2019. The sex-determination pattern in crocodylians: A systematic  
429 review of three decades of research. *Journal of Animal Ecology* 88, 1417–1427.
- 430 Gower, J.C., 1975. Generalized procrustes analysis. *Psychometrika* 40, 33–51.  
431 <https://doi.org/10.1007/bf02291478>
- 432 Griffin, C.T., Nesbitt, S.J., 2016. The femoral ontogeny and long bone histology of the Middle  
433 Triassic (?late Anisian) dinosauriform *Asilisaurus kongwe* and implications for the growth of  
434 early dinosaurs. *Journal of Vertebrate Paleontology* 36, e1111224.  
435 <https://doi.org/10.1080/02724634.2016.1111224>
- 436 Gunz, P., Mitteroecker, P., 2013. SEMILANDMARKS: A METHOD FOR QUANTIFYING  
437 CURVES AND SURFACES. *Hystrix, the Italian Journal of Mammalogy* 24.  
438 <https://doi.org/10.4404/hystrix-24.1-6292>
- 439 Gunz, P., Mitteroecker, P., Bookstein, F.L., 2005. Semilandmarks in Three Dimensions, in: Slice,  
440 D.E. (Ed.), *Modern Morphometrics in Physical Anthropology*. Kluwer Academic Publishers-  
441 Plenum Publishers, New York, pp. 73–98. [https://doi.org/10.1007/0-387-27614-9\\_3](https://doi.org/10.1007/0-387-27614-9_3)
- 442 Handley, W.D., Chinsamy, A., Yates, A.M., Worthy, T.H., 2016. Sexual dimorphism in the late  
443 Miocene mihirung *Dromornis stirtoni* (Aves: Dromornithidae) from the Alcoota Local Fauna  
444 of central Australia. *Journal of Vertebrate Paleontology* 36, e1180298.  
445 <https://doi.org/10.1080/02724634.2016.1180298>
- 446 Hedrick, B.P., Schachner, E.R., Dodson, P., 2021. Alligator appendicular architecture across an  
447 ontogenetic niche shift. *Anat Rec ar.24717*. <https://doi.org/10.1002/ar.24717>
- 448 Hone, D.W.E., Mallon, J.C., 2017. Protracted growth impedes the detection of sexual dimorphism in  
449 non-avian dinosaurs. *Palaeontology* 60, 535–545. <https://doi.org/10.1111/pala.12298>
- 450 Hone, D.W.E., Mallon, J.C., Hennessey, P., Witmer, L.M., 2020. Ontogeny of a sexually selected  
451 structure in an extant archosaur *Gavialis gangeticus* (Pseudosuchia: Crocodylia) with  
452 implications for sexual dimorphism in dinosaurs. *PeerJ* 8, e9134.  
453 <https://doi.org/10.7717/peerj.9134>
- 454 Hunt, K.D., Dunevant, S.E., Yohler, R.M., Carlson, K.J., 2021. Femoral Bicondylar Angles among  
455 Dry-Habitat Chimpanzees (*Pan troglodytes schweinfurthii*) Resemble Those of Humans:  
456 Implications for Knee Function, Australopith Sexual Dimorphism, and the Evolution of  
457 Bipedalism. *Journal of Anthropological Research* 77, 303–337.

- 458 Kaliontzopoulou, A., Carretero, M.A., Llorente, G.A., 2007. Multivariate and geometric  
459 morphometrics in the analysis of sexual dimorphism variation in *Podarcis* lizards. *J. Morphol.*  
460 268, 152–165. <https://doi.org/10.1002/jmor.10494>
- 461 Klingenberg, C.P., 2016. Size, shape, and form: concepts of allometry in geometric morphometrics.  
462 *Dev Genes Evol* 226, 113–137. <https://doi.org/10.1007/s00427-016-0539-2>
- 463 Knell, R.J., Naish, D., Tomkins, J.L., Hone, D.W.E., 2013. Sexual selection in prehistoric animals:  
464 detection and implications. *Trends in Ecology & Evolution* 28, 38–47.  
465 <https://doi.org/10.1016/j.tree.2012.07.015>
- 466 Knell, R.J., Sampson, S., 2011. Bizarre structures in dinosaurs: species recognition or sexual  
467 selection? A response to Padian and Horner. *Journal of Zoology* 283, 18–22.  
468 <https://doi.org/10.1111/j.1469-7998.2010.00758.x>
- 469 Larson, P.L., 1994. *Tyrannosaurus* sex. *The Paleontological Society Special Publications* 7, 139–156.
- 470 Liker, A., Freckleton, R.P., Székely, T., 2013. The evolution of sex roles in birds is related to adult  
471 sex ratio. *Nature communications* 4, 1–6.
- 472 Livezey, B.C., Humphrey, P.S., 1984. Sexual Dimorphism in Continental Steamer-Ducks. *The*  
473 *Condor* 86, 368–377. <https://doi.org/10.2307/1366809>
- 474 Magige, F.J., 2012. Spatial-temporal variation in sex ratio and group size of ostriches (*Struthio*  
475 *namelus*) in the Serengeti National Park and environs in Northern Tanzania. *Tanzania Journal*  
476 *of Science* 38, 15–23.
- 477 Mallon, J.C., 2017. Recognizing sexual dimorphism in the fossil record: lessons from nonavian  
478 dinosaurs. *Paleobiology* 43, 495–507. <https://doi.org/10.1017/pab.2016.51>
- 479 Manin, A., Cornette, R., Lefèvre, C., 2016. Sexual dimorphism among Mesoamerican turkeys: A key  
480 for understanding past husbandry. *Journal of Archaeological Science: Reports* 10, 526–533.  
481 <https://doi.org/10.1016/j.jasrep.2016.05.066>
- 482 Mayr, E., 1939. The sex ratio in wild birds. *The American Naturalist* 73, 156–179.
- 483 Morris, J.S., Brandt, E.K., 2014. Specialization for aggression in sexually dimorphic skeletal  
484 morphology in grey wolves (*Canis lupus*). *J. Anat.* 225, 1–11.  
485 <https://doi.org/10.1111/joa.12191>
- 486 Morris, J.S., Carrier, D.R., 2016. Sexual selection on skeletal shape in Carnivora. *Evolution* 70, 767–  
487 780.
- 488 Olson, V.A., Turvey, S.T., 2013. The evolution of sexual dimorphism in New Zealand giant moa (*Dinornis*)  
489 and other ratites. *Proc. R. Soc. B.* 280, 20130401.  
490 <https://doi.org/10.1098/rspb.2013.0401>
- 491 Owens, I.P.F., Hartley, I.R., 1998. Sexual dimorphism in birds: why are there so many different forms  
492 of dimorphism? *Proc. R. Soc. Lond. B* 265, 397–407. <https://doi.org/10.1098/rspb.1998.0308>
- 493 Padian, K., Horner, J.R., 2011. The evolution of ‘bizarre structures’ in dinosaurs: biomechanics,  
494 sexual selection, social selection or species recognition? *Journal of Zoology* 283, 3–17.  
495 <https://doi.org/10.1111/j.1469-7998.2010.00719.x>
- 496 Parsons, F.G., 1914. The characters of the English thigh-bone. *Journal of Anatomy and physiology*  
497 48, 238.
- 498 Piechowski, R., Tałanda, M., Dzik, J., 2014. Skeletal variation and ontogeny of the Late Triassic  
499 Dinosauriform *Silesaurus opolensis*. *Journal of Vertebrate Paleontology* 34, 1383–1393.  
500 <https://doi.org/10.1080/02724634.2014.873045>
- 501 Prieto-Marquez, A., Gignac, P.M., Joshi, S., 2007. Neontological evaluation of pelvic skeletal  
502 attributes purported to reflect sex in extinct non-avian archosaurs. *Journal of Vertebrate*  
503 *Paleontology* 27, 603–609. [https://doi.org/10.1671/0272-4634\(2007\)27\[603:NEOPSA\]2.0.CO;2](https://doi.org/10.1671/0272-4634(2007)27[603:NEOPSA]2.0.CO;2)
- 504 Prokopenko, N., Melnyk, V., Bazyvoliak, S., 2021. Biological features of egg productivity of black  
505 African ostriches under a semi-intensive keeping. *Ukrainian Journal of Ecology* 33–36.
- 506 Raath, M.A., Carpenter, K., Currie, P.J., 1990. Morphological variation in small theropods and its  
507 meaning in systematics: evidence from *Syntarsus*. *Carpenter and Currie* 91–105.
- 508 Remeš, V., Székely, T., 2010. Domestic chickens defy Rensch’s rule: sexual size dimorphism in  
509 chicken breeds: Sexual size dimorphism in chicken breeds. *Journal of Evolutionary Biology*  
510 23, 2754–2759. <https://doi.org/10.1111/j.1420-9101.2010.02126.x>
- 511



- 512 Rising, J.D., 1987. GEOGRAPHIC VARIATION OF SEXUAL DIMORPHISM IN SIZE OF  
513 SAVANNAH SPARROWS (*PASSERCULUS SANDWICHENSIS*): A TEST OF  
514 HYPOTHESES. *Evolution* 41, 514–524. <https://doi.org/10.1111/j.1558-5646.1987.tb05822.x>  
515 Rohlf, F.J., Slice, D., 1990. Extensions of the Procrustes Method for the Optimal Superimposition of  
516 Landmarks. *Systematic Biology* 39, 40–59. <https://doi.org/10.2307/2992207>  
517 Rozada, L., Allain, R., Vullo, R., Goedert, J., Augier, D., Jean, A., Marchal, J., Peyre de Fabrègues,  
518 C., Qvarnström, M., Royo-Torres, R., 2021. A Lower Cretaceous *Lagerstätte* from France: a  
519 taphonomic overview of the Angeac-Charente vertebrate assemblage. *Lethaia* 54, 141–165.  
520 <https://doi.org/10.1111/let.12394>  
521 Rozada, L., Allain, R., Vullo, R., Leprince, A., Tournepiche, J.F., 2014. Taphonomy of the  
522 ornithomimosaur dinosaur herd from the Early Cretaceous lignitic bone bed of Angeac-  
523 Charente (France), in: 74th Annual Meeting of the Society of Vertebrate Paleontology.  
524 Saitta, E.T., 2015. Evidence for Sexual Dimorphism in the Plated Dinosaur *Stegosaurus mjosi*  
525 (*Ornithischia*, *Stegosauria*) from the Morrison Formation (Upper Jurassic) of Western USA.  
526 *PLoS ONE* 10, e0123503. <https://doi.org/10.1371/journal.pone.0123503>  
527 Saitta, E.T., Stockdale, M.T., Longrich, N.R., Bonhomme, V., Benton, M.J., Cuthill, I.C., Makovicky,  
528 P.J., 2020. An effect size statistical framework for investigating sexual dimorphism in non-  
529 avian dinosaurs and other extinct taxa. *Biological Journal of the Linnean Society* 131, 231–  
530 273. <https://doi.org/10.1093/biolinnean/blaa105>  
531 Schlager, S., 2017. Morpho and Rvcg – Shape Analysis in R, in: *Statistical Shape and Deformation*  
532 *Analysis*. Elsevier, pp. 217–256. <https://doi.org/10.1016/B978-0-12-810493-4.00011-0>  
533 Schnell, G.D., Worthen, G.L., Douglas, M.E., 1985. Morphometric Assessment of Sexual  
534 Dimorphism in Skeletal Elements of California Gulls. *The Condor* 87, 484–493.  
535 <https://doi.org/10.2307/1367944>  
536 Schweitzer, M.H., Eusey, R.M., Dacke, C.G., Horner, J.R., Lamm, E.-T., 2007. Do egg-laying  
537 crocodylian (*Alligator mississippiensis*) archosaurs form medullary bone? *Bone* 40, 1152–  
538 1158. <https://doi.org/10.1016/j.bone.2006.10.029>  
539 Schweitzer, M.H., Wittmeyer, J.L., Horner, J.R., 2005. Gender-Specific Reproductive Tissue in  
540 Ratites and *Tyrannosaurus rex*. *Science* 308, 1456–1460.  
541 <https://doi.org/10.1126/science.1112158>  
542 Scrucca, L., Fop, M., Murphy, T.B., Raftery, A.E., 2016. mclust 5: clustering, classification and  
543 density estimation using Gaussian finite mixture models. *The R journal* 8, 289.  
544 Székely, Tamas, Lislevand, T., Figuerola, J., 2007. Sexual size dimorphism in birds, in: Fairbairn,  
545 D.J., Blanckenhorn, W.U., Székely, Tamás (Eds.), *Sex, Size and Gender Roles: Evolutionary*  
546 *Studies of Sexual Size Dimorphism*. Oxford University Press, pp. 27–37.  
547 Tardieu, C., Glard, Y., Garron, E., Boulay, C., Jouve, J.-L., Dutour, O., Boëtsch, G., Bollini, G., 2006.  
548 Relationship between formation of the femoral bicondylar angle and trochlear shape:  
549 independence of diaphyseal and epiphyseal growth. *American Journal of Physical*  
550 *Anthropology: The Official Publication of the American Association of Physical*  
551 *Anthropologists* 130, 491–500.  
552 Wiley, D.F., Amenta, N., Alcantara, D.A., Ghosh, D., Kil, Y.J., Delson, E., Harcourt-Smith, W.,  
553 Rohlf, F.J., St John, K., Hamann, B., 2005. Evolutionary morphing. *IEEE*.  
554 Witmer, L.M., Thomason, J.J., 1995. The extant phylogenetic bracket and the importance of  
555 reconstructing soft tissues in fossils. *Functional morphology in vertebrate paleontology* 1, 19–  
556 33.  
557 Woodward, D.E., Murray, J.D., 1993. On the effect of temperature-dependent sex determination on  
558 sex ratio and survivorship in crocodylians. *Proceedings of the Royal Society of London. Series*  
559 *B: Biological Sciences* 252, 149–155.  
560 Zelditch, M.L., Swiderski, D.L., Sheets, H.D., Fink, W.L. (Eds.), 2012. *Geometric morphometrics for*  
561 *biologists: a primer*. Elsevier Academic Press, London, Waltham, San Diego:  
562 **Supplementary Figures and Tables**

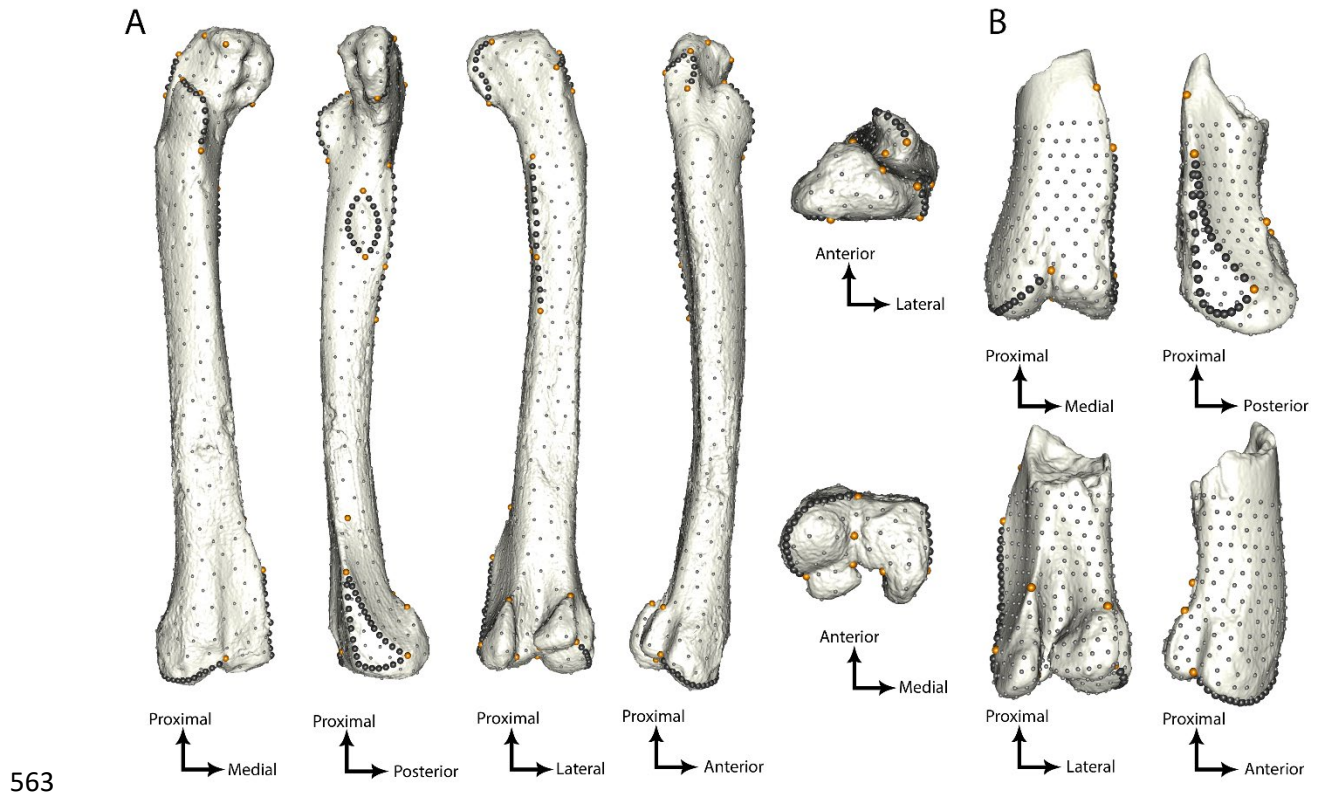

564 Figure S1: Template of A) right complete femur of ANG10 90 and B) mirrored left distal epiphysis of  
565 ANG14 3188 with anatomical landmarks (orange), sliding semilandmarks along curves (dark grey) and  
566 surfaces (light grey).

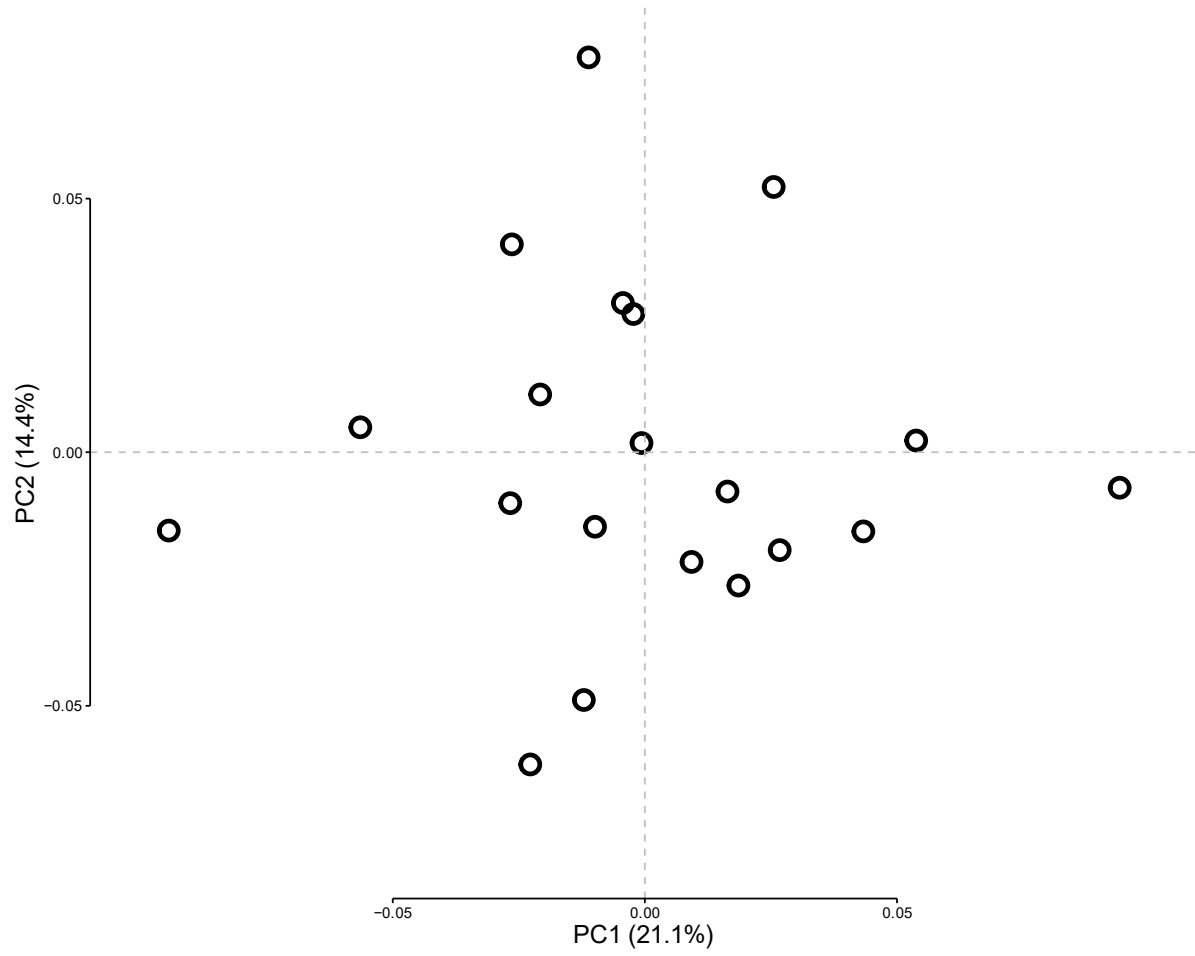

567

568 Figure S2: The two first axes of the PCA for proximal epiphyses of femora

569

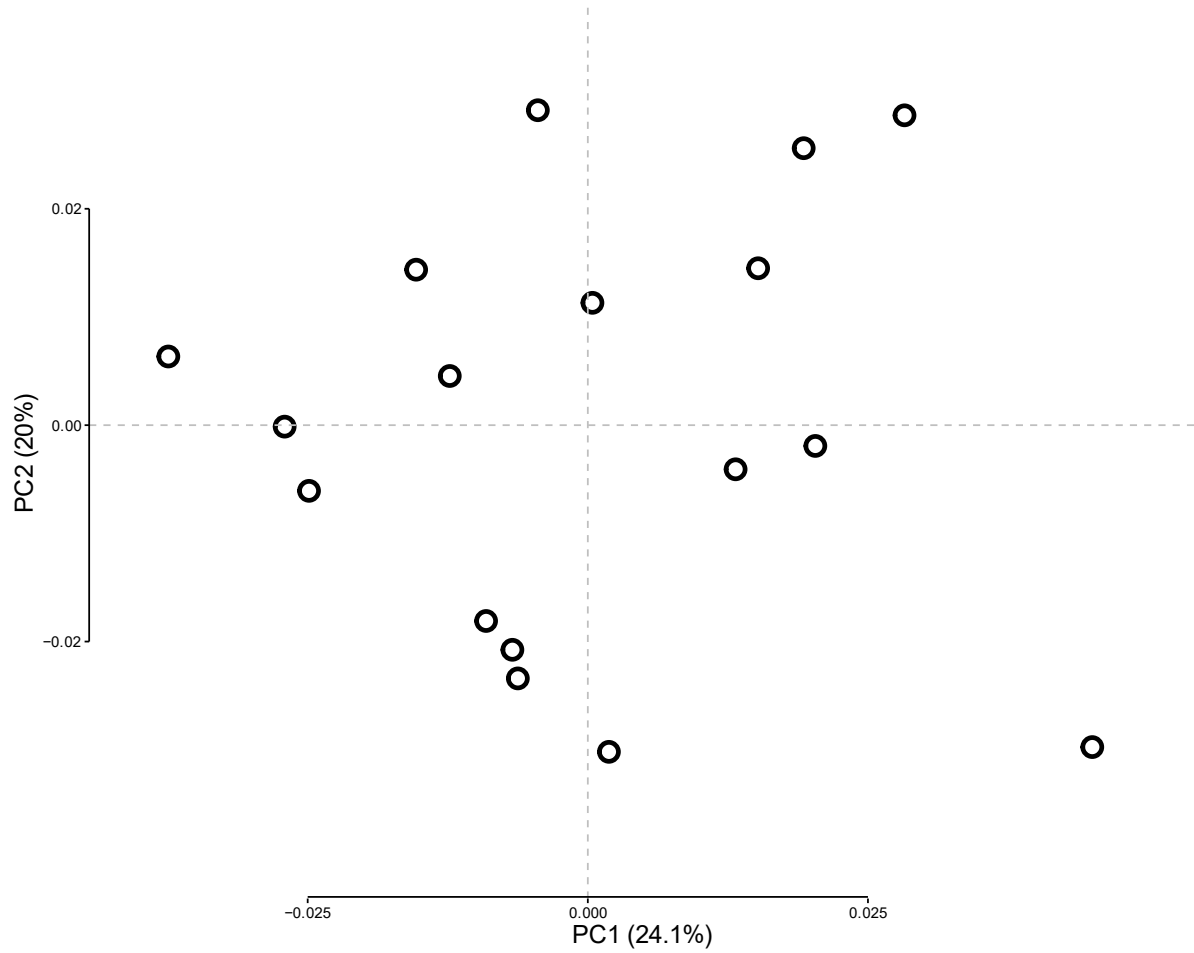

570

571 Figure S3: The two first axes of the PCA for complete tibiae.

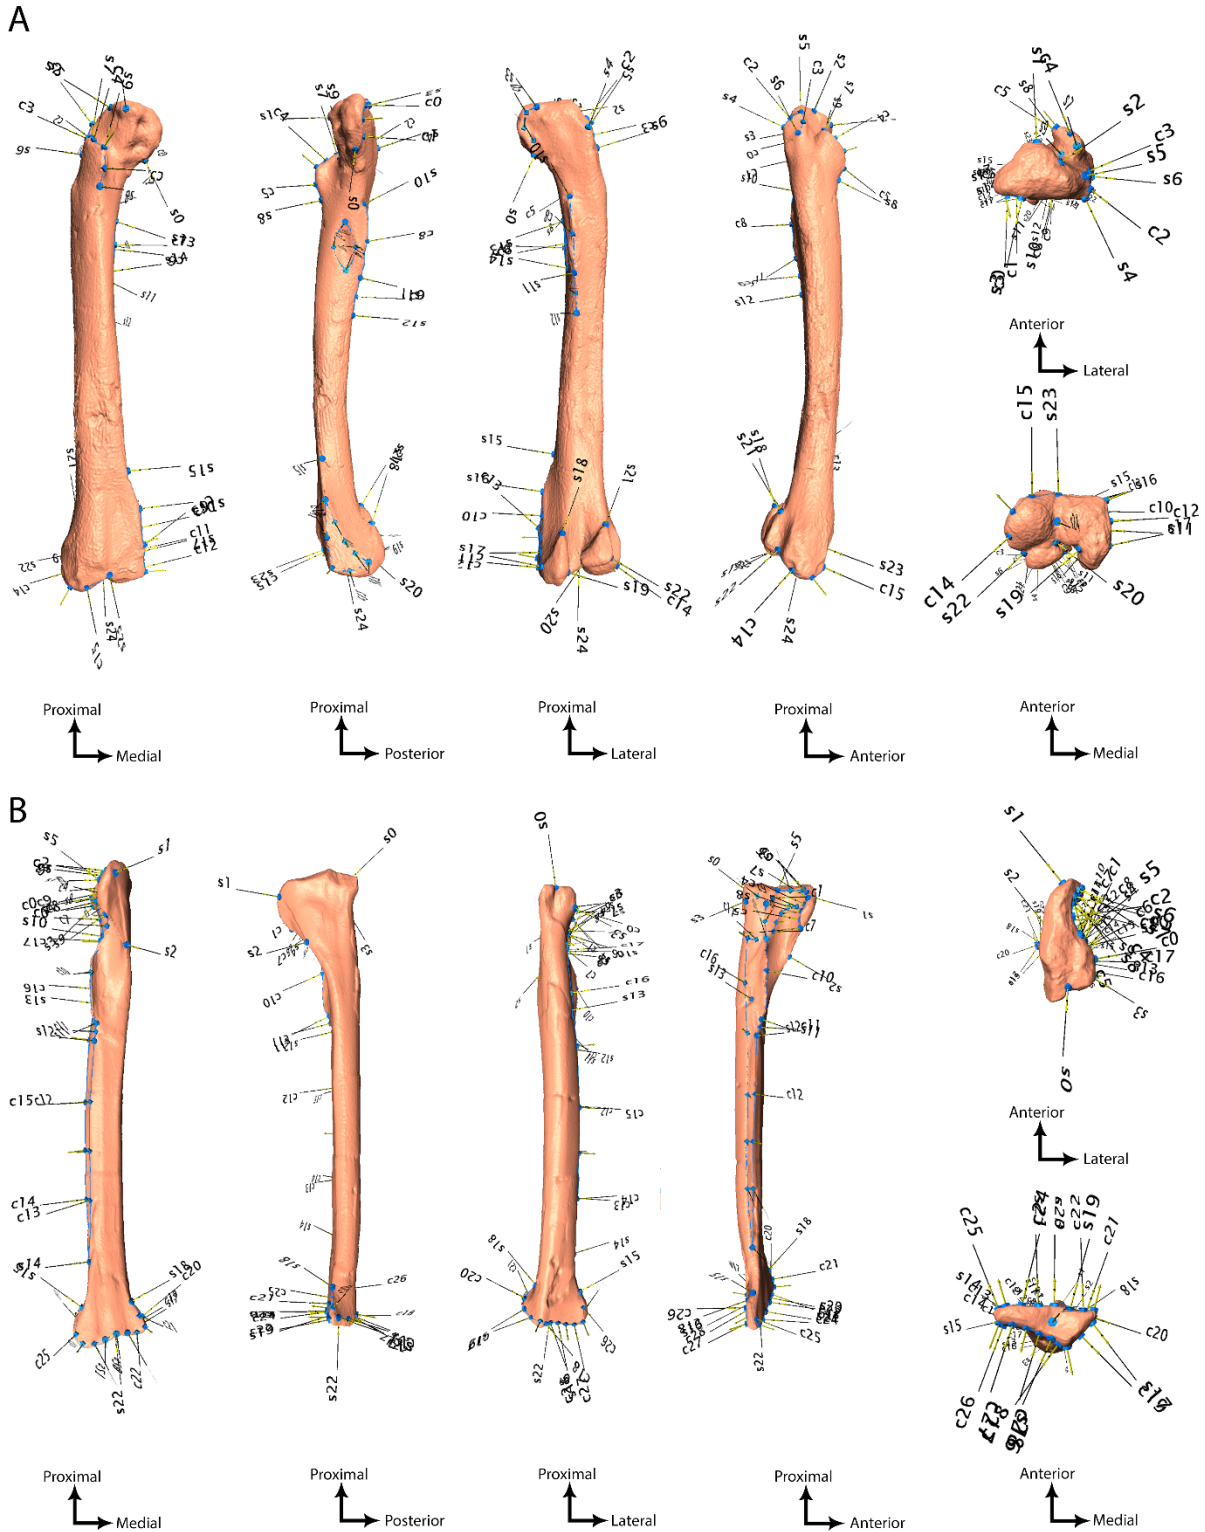

572

573 Figure S4: Landmark configuration on the templates A) femur; B) tibia, with numerotation following  
 574 the scheme shown in Tables S4 & S5, Abbreviations: s, anatomical landmarks; c, sliding semilandmarks  
 575 on curves.

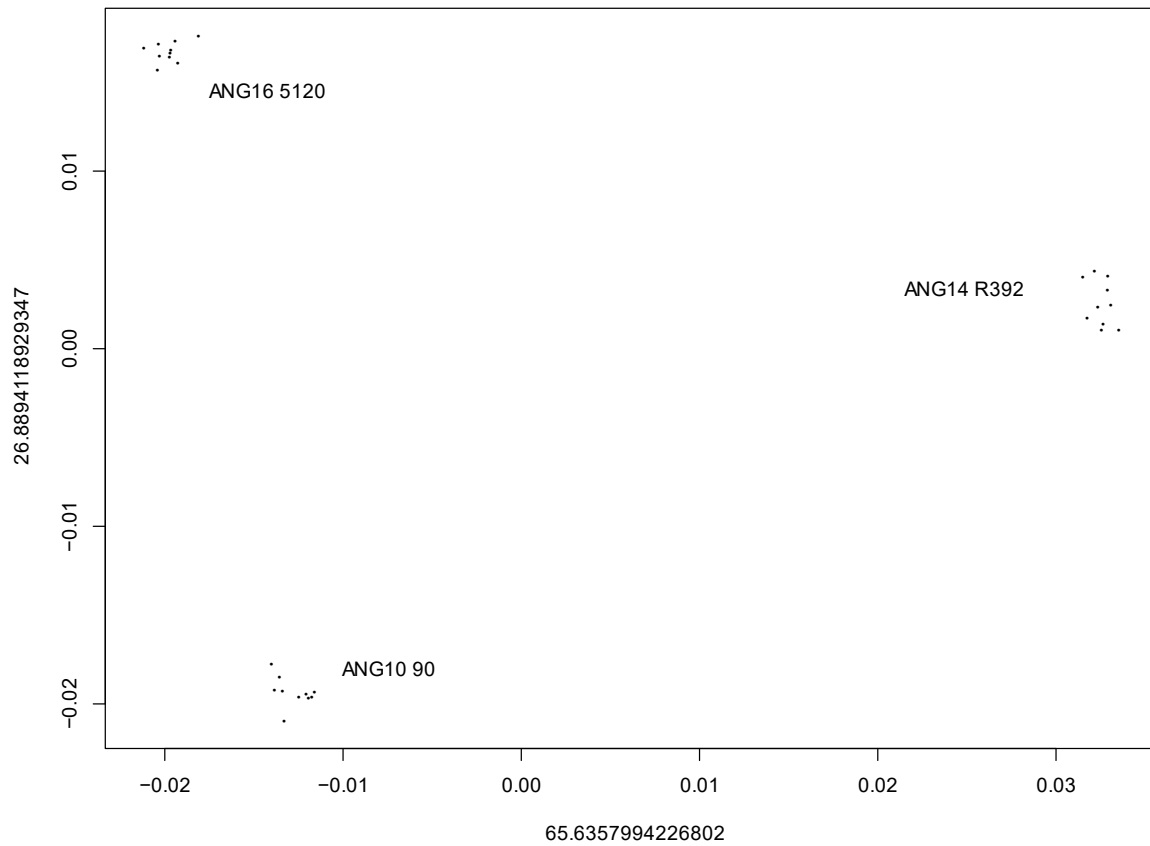

576

577 Figure S5: The two first axes of the PCA showing the quantification of the repeatability for the landmark  
578 configuration on femora.



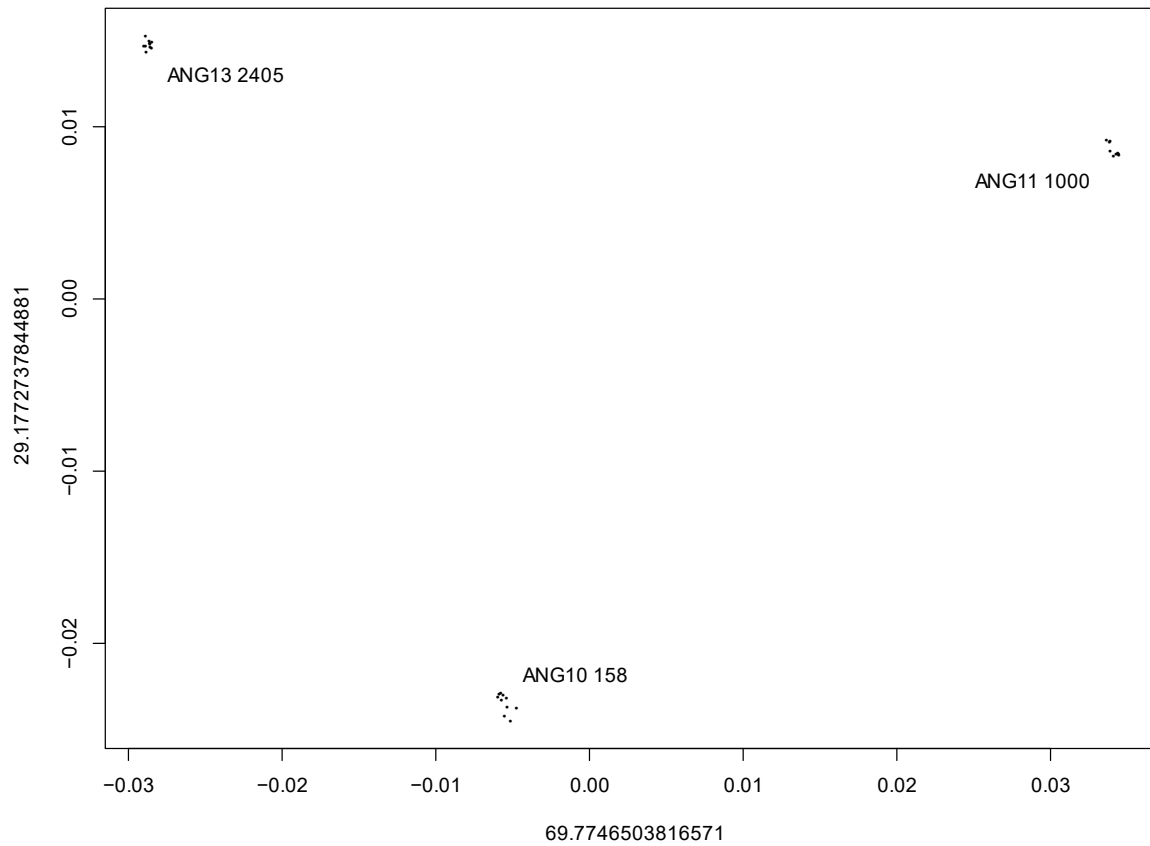

579

580 Figure S6: The two first axes of the PCA showing the quantification of the repeatability for the landmark  
581 configuration on tibiae.

582

583 Table S1: Statistical parameters used in this study for size-effect and cluster attribution

| Parameters                                           | Complete femora                | Distal epiphyses                |
|------------------------------------------------------|--------------------------------|---------------------------------|
| Log centroid size vs. PC1 scores                     | $r^2$ : 0.12; $p$ -value > 0.1 | $r^2$ : 0.07 ; $p$ -value > 0.1 |
| Model selected by the EM                             | univariate, equal variance     | univariate, equal variance      |
| Number of components                                 | 2                              | 2                               |
| BIC                                                  | 46.54                          | 48.47                           |
| Log-likelihood                                       | 27.87                          | 30.12                           |
| Mixing probabilities for each cluster                | 0.61; 0.39                     | 0.52; 0.48                      |
| Highest uncertainty for cluster attribution/specimen | 0.0001                         | 0.02                            |

584

585 Table S2: Cluster attribution for complete femora studied in analyses for both complete femora and  
 586 distal epiphyses

| Specimen    | Morph attribution for complete femora | Morph attribution for distal epiphyses |
|-------------|---------------------------------------|----------------------------------------|
| ANG 10 84   | A                                     | A                                      |
| ANG 10 90   | B                                     | B                                      |
| ANG 11 1271 | B                                     | B                                      |
| ANG 13 2780 | A                                     | A                                      |
| ANG 14 R392 | B                                     |                                        |
| ANG 15 3865 | A                                     | A                                      |
| ANG 15 4182 | A                                     |                                        |
| ANG 16 5017 | A                                     |                                        |
| ANG 16 5140 | A                                     |                                        |
| ANG 16 5120 | B                                     | B                                      |

587

588 Table S3: Specimens used in this study. \* refers to specimens digitized with the NextEngine, other  
 589 specimens were digitized using the Artec EVA. Abbreviations: Col. Nb., collection number; L, left;  
 590 R, right

| Col. Nb.    | Bone  | Integrity | Side |
|-------------|-------|-----------|------|
| ANG 10 43   | Femur | Proximal  | L    |
| ANG 10 53   | Femur | Proximal  | R    |
| ANG 10 84   | Femur | Complete  | R    |
| ANG 10 86   | Femur | Proximal  | L    |
| ANG 10 90   | Femur | Complete  | L    |
| ANG 10 171  | Femur | Distal    | L    |
| ANG 11 735  | Femur | Distal    | R    |
| ANG 11 811a | Femur | Proximal  | R    |
| ANG 11 811b | Femur | Distal    | R    |
| ANG 11 1107 | Femur | Distal    | R    |
| ANG 11 1209 | Femur | Proximal  | L    |
| ANG 11 1271 | Femur | Complete  | R    |
| ANG 12 1844 | Femur | Distal    | L    |
| ANG 13 2282 | Femur | Proximal  | L    |
| ANG 13 2381 | Femur | Proximal  | R    |
| ANG 13 2428 | Femur | Distal    | L    |
| ANG 13 2451 | Femur | Distal    | R    |
| ANG 13 2749 | Femur | Proximal  | L    |
| ANG 13 2757 | Femur | Proximal  | R    |
| ANG 13 2780 | Femur | Complete  | L    |
| ANG 13 2807 | Femur | Distal    | R    |
| ANG 14 R392 | Femur | Complete  | R    |
| ANG 14 3188 | Femur | Distal    | L    |
| ANG 14 3488 | Femur | Proximal  | L    |
| ANG 14 3516 | Femur | Proximal  | R    |

|                |       |          |   |
|----------------|-------|----------|---|
| ANG 14 3570    | Femur | Proximal | R |
| ANG 15 3865    | Femur | Complete | R |
| ANG 15 4182    | Femur | Complete | L |
| ANG 16 5017    | Femur | Complete | L |
| ANG 16 5106    | Femur | Proximal | R |
| ANG 16 5120    | Femur | Proximal | R |
| ANG 16 5140    | Femur | Complete | R |
| ANG 16 5077    | Femur | Distal   | R |
| ANG 16 5120    | Femur | Complete | R |
| ANG 17 5704    | Femur | Proximal | L |
| ANG 17 5709    | Femur | Distal   | L |
| ANG 19 6825*   | Femur | Distal   | L |
| ANG 20 7346*   | Femur | Distal   | R |
| ANG 10 158     | Tibia | Complete | L |
| ANG 10 1024.25 | Tibia | Complete | R |
| ANG 11 1000    | Tibia | Complete | R |
| ANG 12 1893    | Tibia | Complete | R |
| ANG 13 2405    | Tibia | Complete | L |
| ANG 13 2538    | Tibia | Complete | R |
| ANG 13 2588    | Tibia | Complete | L |
| ANG 13 2589    | Tibia | Complete | L |
| ANG 13 2599    | Tibia | Complete | L |
| ANG 13 2699    | Tibia | Complete | L |
| ANG 14 3031    | Tibia | Complete | L |
| ANG 14 3611    | Tibia | Complete | L |
| ANG 15 4038    | Tibia | Complete | L |
| ANG 15 4070    | Tibia | Complete | R |
| ANG 16 1349    | Tibia | Complete | R |
| ANG 16 5030a   | Tibia | Complete | R |
| ANG 17 2207    | Tibia | Complete | L |

591

592 Table S4: Landmark scheme of the femur according to the numerotation shown in Figure S4.

593 Abbreviations: s, anatomical landmarks; c, sliding semilandmarks on curves.

| N. | Description                                                                                 |
|----|---------------------------------------------------------------------------------------------|
| 0  | Most distal point of the fovea                                                              |
| 1  | Most anterior point of the ALT                                                              |
| 2  | Maximum of concavity on the lateral part of the ALT                                         |
| 3  | Intersection between the most proximal point of the fovea and the lateral border of the AMT |
| 4  | Most posterior point of the proximal border of the greater trochanter                       |
| 5  | Most anterior point of the proximal border of the greater trochanter                        |
| 6  | Most distal point of the anterior border of the greater trochanter                          |
| 7  | Most posterior point of the proximal border of the lesser trochanter (anterior trochanter)  |
| 8  | Most distal point of the anterior border of the lesser trochanter (accessory trochanter)    |
| 9  | Foramen in the depression between the lesser trochanter and the femoral head                |
| 10 | Most proximal point of the 4 <sup>th</sup> trochanter                                       |
| 11 | Maximum of concavity of the distal part of the 4 <sup>th</sup> trochanter                   |
| 12 | Most distal part of the 4 <sup>th</sup> trochanter                                          |
| 13 | Most proximal point of the CFL-BR fossa                                                     |
| 14 | Most distal point of the CFL-BR fossa                                                       |

|          |                                                                                                                               |
|----------|-------------------------------------------------------------------------------------------------------------------------------|
| 15       | Most proximal point of the ectocondylar tuberosity                                                                            |
| 16       | Intersection between the most distal part of the MDC (mediodistal crest) and the most proximal part of the MF (medial flange) |
| 17       | Most posterior point of the MF                                                                                                |
| 18       | Maximum of concavity on the most proximal point of the medial condyle                                                         |
| 19       | Maximum of concavity between the medial condyle and the posterior intercondylar fossa                                         |
| 20       | Maximum of concavity between the crista tibiofibularis and the posterior intercondylar fossa                                  |
| 21       | Maximum of concavity on the most proximal point of the crista tibiofibularis                                                  |
| 22       | Maximum of concavity between the crista tibiofibularis and the lateral condyle                                                |
| 23       | Maximum of concavity in the anterior intercondylar fossa                                                                      |
| 24       | Maximum of concavity on the most distal surface of the distal epiphyses.                                                      |
| c0; c1   | Medial border of the fovea                                                                                                    |
| c2; c3   | Proximal and anterior border of the greater trochanter                                                                        |
| c4; c5   | Proximal and anterior border of the lesser trochanter                                                                         |
| c6; c7   | Outline of the CFL-BR fossa                                                                                                   |
| c8; c9   | Posterior border of the 4 <sup>th</sup> trochanter                                                                            |
| c10; c13 | Outline of the medial flange                                                                                                  |
| c14 c15  | Outline of the distal border of the lateral condyle                                                                           |

594

595 Table S5: Landmark scheme of the tibia according to the numerotation shown in Figure S5.

596 Abbreviations: s, anatomical landmarks; c, sliding semilandmarks on curves.

| N.       | Description                                                                                    |
|----------|------------------------------------------------------------------------------------------------|
| 0        | Most proximal point of the maximum of concavity in the intercondylar groove on the tibial head |
| 1        | Most proximal point of the medial side of the cnemial crest                                    |
| 2        | Maximum of concavity along the distal part of medial side of the cnemial crest                 |
| 3        | Most distal point of the lateral condyle                                                       |
| 4        | Most anterior point of the distal border of the lateral condyle                                |
| 5        | Most posterior point of the proximal border of the lateral side of the cnemial crest           |
| 6        | Most anterior point of the proximal border of the lateral side of the cnemial crest            |
| 7        | Most anterior point of the anterior border of the lateral side of the cnemial crest            |
| 8        | Most posterior point of along the anterior border of the lateral side of the cnemial crest     |
| 9        | Most distal point of the anterior border of the lateral side of the cnemial crest              |
| 10       | Most proximal point of the fibular crest                                                       |
| 11       | Maximum of concavity of the distal part of the fibular crest                                   |
| 12       | Most distal point of the fibular crest                                                         |
| 13       | Foramen on the posterior side of the fibular crest                                             |
| 14       | Most distal point of the surface of contact with the fibula                                    |
| 15       | Maximum of concavity on the proximal border of the lateral malleolus                           |
| 16       | Maximum of concavity along the lateral border of the posterior distal tuberosity               |
| 17       | Most medial point of the medial malleolus                                                      |
| 18       | Maximum of concavity on the proximal border of the medial malleolus                            |
| 19       | Maximum of concavity along the medial border of the anterior distal tuberosity                 |
| 20       | Most anterior point of the anterior distal tuberosity                                          |
| 21       | Maximum of concavity along the lateral border of the anterior distal tuberosity                |
| 22       | Maximum of depression on the distal surfaces of the distal epiphysis                           |
| c0; c1   | Most distal border of the lateral side of the lateral condyle                                  |
| c2; c9   | Outline of the fossa fibularis/insicular tibialis                                              |
| c4; c5   | Proximal and anterior border of the lesser trochanter                                          |
| c6; c7   | Outline of the CFL-BR fossa                                                                    |
| c8; c9   | Posterior border of the 4 <sup>th</sup> trochanter                                             |
| c10; c11 | Outline of the fibular crest                                                                   |
| c12; c17 | Outline of the surface of contact with the fibula                                              |
| c18; c28 | Outline of the articular surface of the distal epiphysis                                       |

597
